# Supplementary material
Source: PubMed Central journal article supplement (PMC6209549)
Supplement: CONC-25-e411-s001.pdf [file CONC-25-e411-s001.pdf]

## **Supplemental Materials for**

### **CT-quantified body composition predicts short-term outcome following gastrectomy of gastric cancer**

Y. Zhang, J.P. Wang, X.L. Wang, H. Tian, T.T. Gao, L.M. Tang, F. Tian, J.W. Wang, H.J. Zheng, L. Zhang, X.J. Gao, G.L. Li, X.Y. Wang

#### **Correspondence author**

Xinying Wang, MD, PhD, Research Institute of General Surgery, Jinling Hospital, Medical School of Nanjing University, 305 East Zhongshan Road, Nanjing, 210002, Jiangsu Province, China. Tel: 86 25 80861167; Fax: 86 25 84803956; E-mail: wangxinying@nju.edu.cn

Guoli Li, MD, PhD, Research Institute of General Surgery, Jinling Hospital, Medical School of Nanjing University, 305 East Zhongshan Road, Nanjing, 210002, Jiangsu Province, China. Tel: 86 25 80860064. Fax: 86 25 84803956; E-mail: liguoli15@163.com

#### **Listing of Supplemental Material(s):**

Supplemental Figure 1: Computed tomography images of the third lumbar vertebra used to calculate body composition variables.

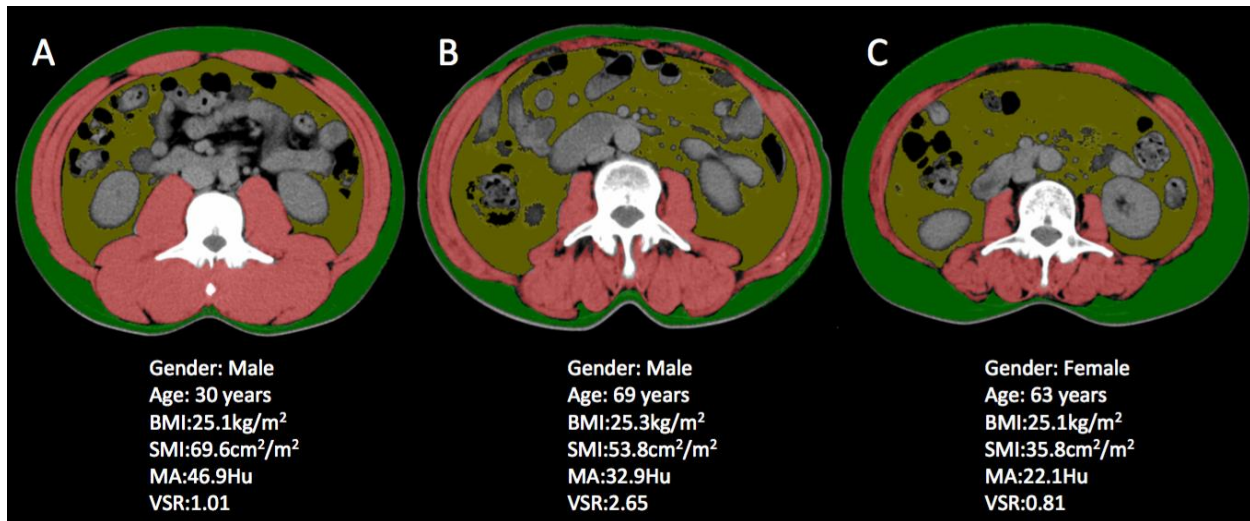

**Supplemental Figure 1. Computed tomography images of the third lumbar vertebra used to calculate body composition variables.** The red, green, and yellow shadows indicate the skeletal muscle, subcutaneous adipose tissue, and visceral adipose tissue areas, respectively. A, B, and C show the findings from three patients with gastric cancer. Although their BMIs were almost identical, their body composition showed great differences. BMI, body mass index; SMI, skeletal muscle index; MA, muscle attenuation; Hu, Hounsfield units; VSR, visceral to subcutaneous adipose tissue area ratio.
